# Supplementary material
Source: Springer Nature journal article supplement (https://www.springermedizin.de/resource/supplementary/12889_2004_322_MOESM1_ESM.pdf/9501126)

Breast cancer cases

100%  
90%  
80%  
70%  
60%  
50%  
40%  
30%  
20%  
10%  
0%

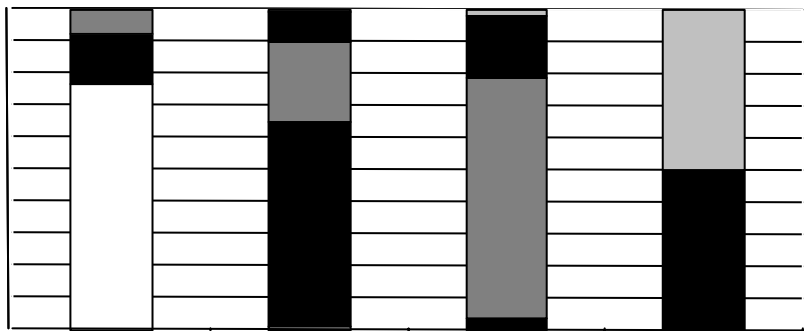

ca in situ  
(n=13)

localized  
(n=217)

not localized  
(n=99)

with metastasis  
(n=2)

Severity index categories

Tumor  
stage

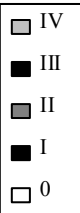

Supplement: MOESM1 [file 9501126]
